# Supplementary material for: Inverse Design of Aluminium Alloys Using Genetic Algorithm: A Class-Based Workflow
Source: MDPI journal article supplement (doi:10.3390/met14020239), 2024-02-16
Supplement: s1 [file s1]

Archive with 1 entries (1 files):
- metals-2818370-supplementary.pdf
